# Supplementary material
Source: HighWire-hosted journal article supplement (https://www.annfammed.org/highwire/filestream/8552/field_highwire_adjunct_files/0/Mangione-Smith_Supp_App.pdf)
Supplement: Mangione-Smith_Supp_App.pdf [file Mangione-Smith_Supp_App.pdf]

## Supplementary materials for:

Mangione-Smith R, Zhou C, Robinson JD, Taylor JA, Elliott MN, Heritage J. Communication practices and antibiotic use for acute respiratory tract infections in children. *Ann Fam Med*. 2015;13(3):221-227.

## APPENDIX 1

**Physician Post-Visit Checklist Study ID#:** \_\_\_\_\_

1) Please complete this checklist immediately after each visit with a study parent and child. Unless otherwise noted, please **check all** categories that apply to this visit.

**Symptoms:** (Check all that apply)

\_\_\_\_ Fever \_\_\_\_ Sore throat \_\_\_\_ Headache  
\_\_\_\_ Cough \_\_\_\_ Poor appetite \_\_\_\_ Facial Pain  
\_\_\_\_ Congestion/runny nose \_\_\_\_ Not sleeping well \_\_\_\_ Other symptoms  
\_\_\_\_ Ear pain \_\_\_\_ Vomiting  
\_\_\_\_ Ear tugging \_\_\_\_ Stomach Ache If other, please specify: \_\_\_\_\_

**Physical Examination Findings:** (Check all that apply)

\_\_\_\_ Fever (measured or by report ) \_\_\_\_ Abnormal Tympanic Membranes  
\_\_\_\_ Cervical Lymphadenopathy \_\_\_\_ Pharyngeal Erythema  
\_\_\_\_ Purulent Eye Drainage \_\_\_\_ Pharyngeal Exudates  
\_\_\_\_ Scleral/Conjunctival Injection \_\_\_\_ Rales  
\_\_\_\_ Purulent Rhinorrhea \_\_\_\_ Rhonchi  
\_\_\_\_ Clear Rhinorrhea \_\_\_\_ Wheezing  
\_\_\_\_ Rash \_\_\_\_ Other: \_\_\_\_\_  
(please specify)

**Diagnosis:** (Check all that apply)

\_\_\_\_ Acute Otitis Media \_\_\_\_ Mycoplasma Infection \_\_\_\_ Viral Bronchitis  
\_\_\_\_ Asthma \_\_\_\_ Otitis Externa \_\_\_\_ Viral Pharyngitis \_\_\_\_ Bacterial Bronchitis \_\_\_\_ Otitis Media with  
\_\_\_\_ Viral Pneumonia  
\_\_\_\_ Bacterial Pneumonia Effusion \_\_\_\_ Viral Stomatitis  
\_\_\_\_ Bronchiolitis \_\_\_\_ Streptococcal Pharyngitis \_\_\_\_ Viral Upper Respiratory \_\_\_\_ Conjunctivitis \_\_\_\_ Sinusitis  
Tract Infection  
\_\_\_\_ Croup  
\_\_\_\_ Other: \_\_\_\_\_

(please specify)

**Treatment Prescribed or Recommended:** (Check all that apply)

\_\_\_\_ Analgesic/Antipyretic \_\_\_\_ Combination Antihistamine/Decongestant \_\_\_\_ Beta-Agonist  
\_\_\_\_ Antihistamine \_\_\_\_ Cough Medicine \_\_\_\_ Ophthalmic Antibiotic Drops or Ointment  
\_\_\_\_ Antibiotic \_\_\_\_ Decongestant \_\_\_\_ Other \_\_\_\_\_  
\_\_\_\_ Antibiotic prescription provided, but (please specify) parent told not to fill before further contact

**THANK YOU VERY MUCH FOR COMPLETING THIS QUESTIONNAIRE.**

**PLEASE GIVE YOUR COMPLETED SURVEY TO ONE OF THE RESEARCH ASSISTANTS WHEN YOU ARE DONE.**
